# Supplementary material
Source: PubMed Central journal article supplement (PMC8239806)
Supplement: mmc1.pdf [file mmc1.pdf]

## **Supplemental information**

### **Characterization of SARS-CoV-2**

**nucleocapsid protein reveals multiple**

**functional consequences of the C-terminal domain**

**Chao Wu, Abraham J. Qavi, Asmaa Hachim, Niloufar Kavian, Aidan R. Cole, Austin B. Moyle, Nicole D. Wagner, Joyce Sweeney-Gibbons, Henry W. Rohrs, Michael L. Gross, J. S. Malik Peiris, Christopher F. Basler, Christopher W. Farnsworth, Sophie A. Valkenburg, Gaya K. Amarasinghe, and Daisy W. Leung**

A

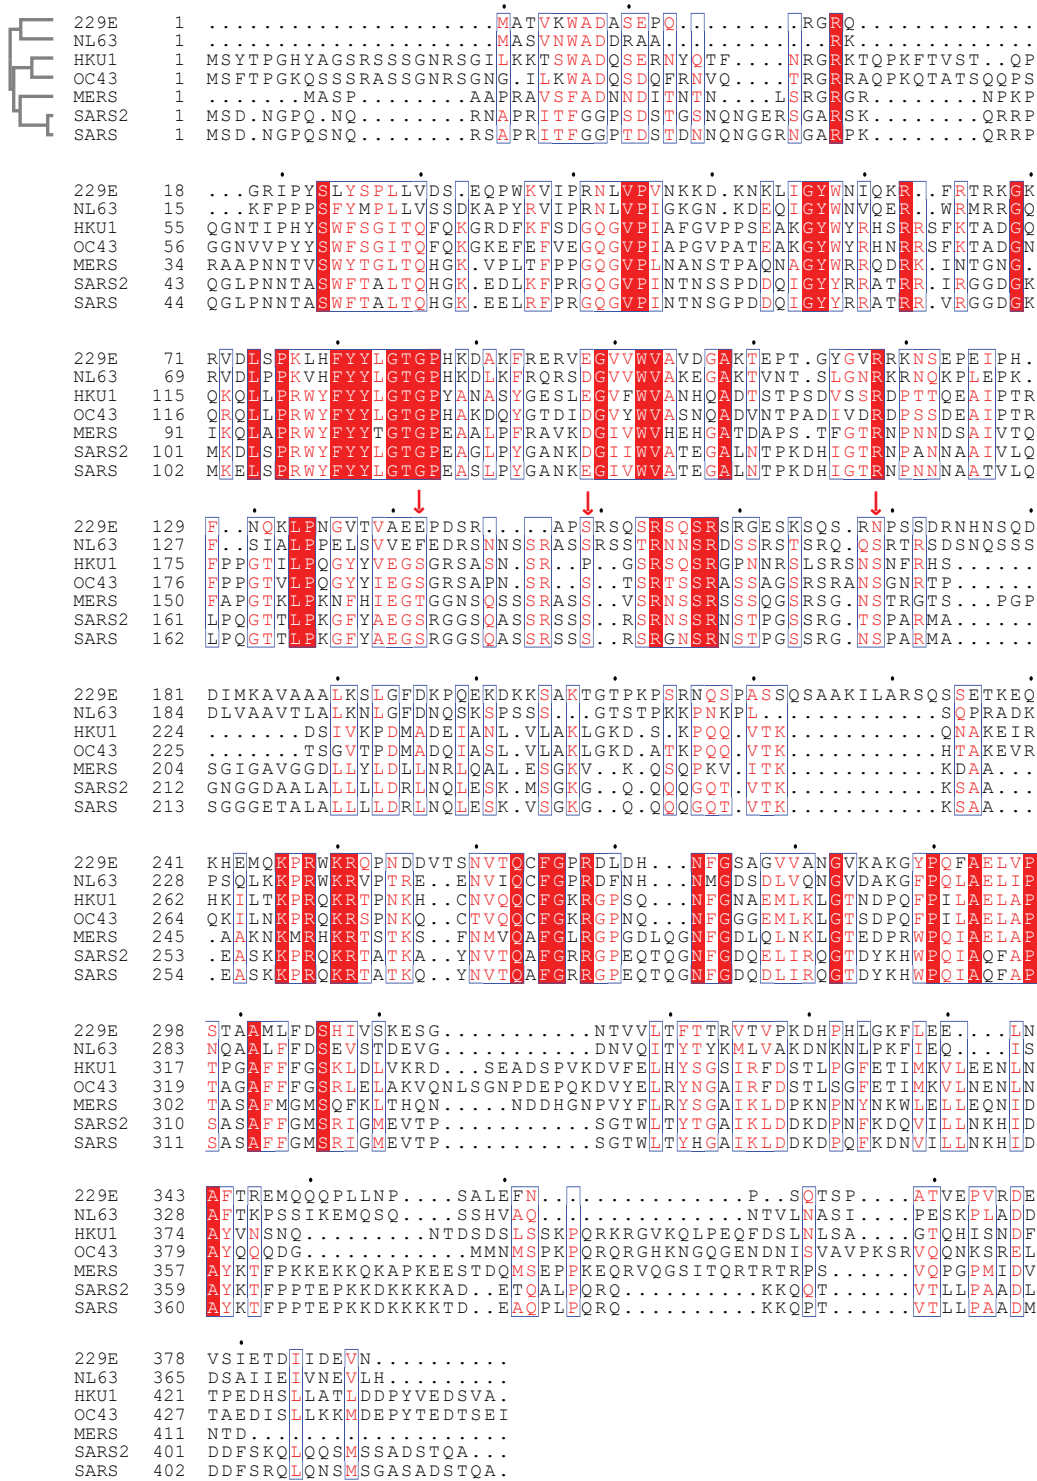

B

|      | 229E | NL63 | HK1 | OC43 | MERS | SARS |
|------|------|------|-----|------|------|------|
| FL   | 26   | 28   | 34  | 36   | 49   | 90   |
| Narm | 12   | 0    | 17  | 29   | 22   | 84   |
| NTD  | 32   | 30   | 44  | 43   | 60   | 92   |
| LKR  | 26   | 36   | 31  | 34   | 46   | 89   |
| CTD  | 30   | 28   | 36  | 37   | 54   | 96   |
| Carm | 10   | 21   | 15  | 18   | 14   | 74   |

**Supplementary Figure 1, related to Figure 1. Multiple sequence alignment of coronavirus nucleocapsids.** **A.** Multiple sequence alignment of coronavirus nucleocapsids. Sequences were aligned using Clustal Omega. Accession numbers used are 229E (APT69891.1), NL63 (YP\_003771.1), HK1 (AAT98585.1), OC43 (AAR01019.1), MERS (AKL80590.1), SARS (AAP30037.1), SARS2 (YP\_009724397.2). Alignments were analyzed using ESPript3. The three serines (176, 188, and 206) are labeled with red arrows. **B.** Sequence identity between SARS-CoV-2 N and that of common cold coronaviruses and MERS and SARS. FL, full length. All units are in %. Percent identity matrixes for corresponding domains of N are generated using Clustal2.1.

A

|                   | MW (kDa) | polydispersity (%) |             |
|-------------------|----------|--------------------|-------------|
|                   |          | peak 1             | peak 2      |
| $N_{WT}$          | 46       | $20 \pm 1$         | $40 \pm 20$ |
| $N_{NTD-LKR-CTD}$ | 35       | $17 \pm 7$         | $30 \pm 20$ |
| $N_{NTD-LKR}$     | 22       | $23 \pm 3$         |             |
| $N_{NTD}$         | 14       | $7 \pm 2$          |             |
| $N_{CTD}$         | 14       | $15 \pm 1$         |             |

B

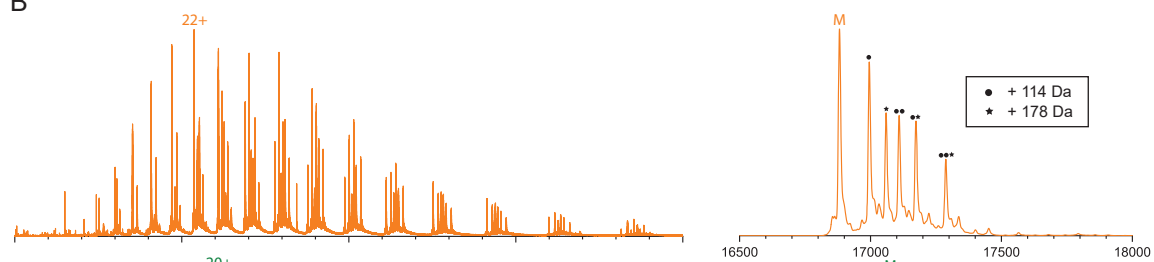

C

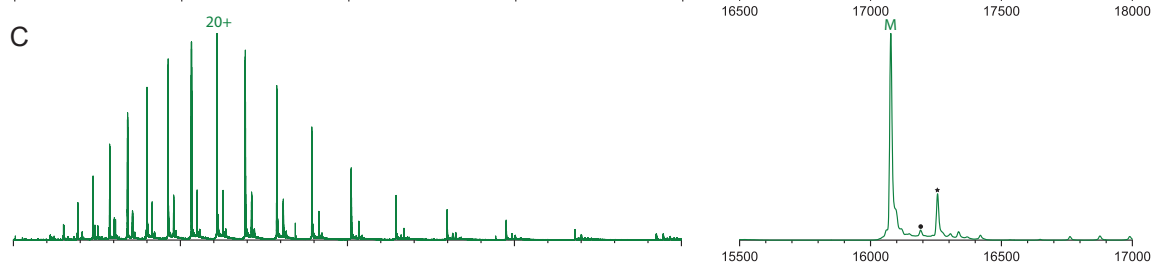

D

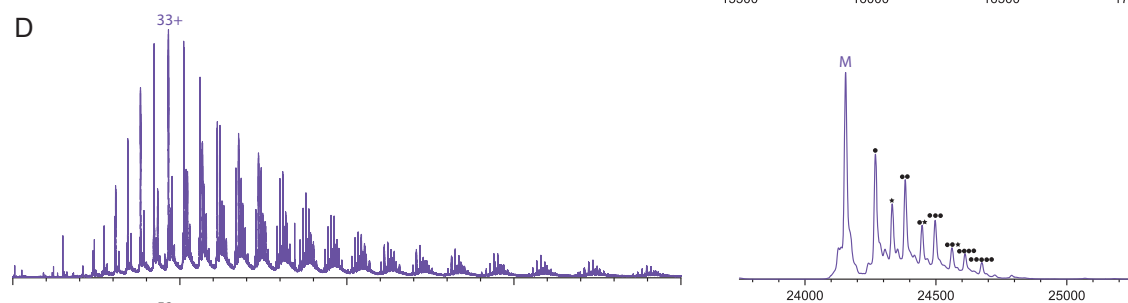

E

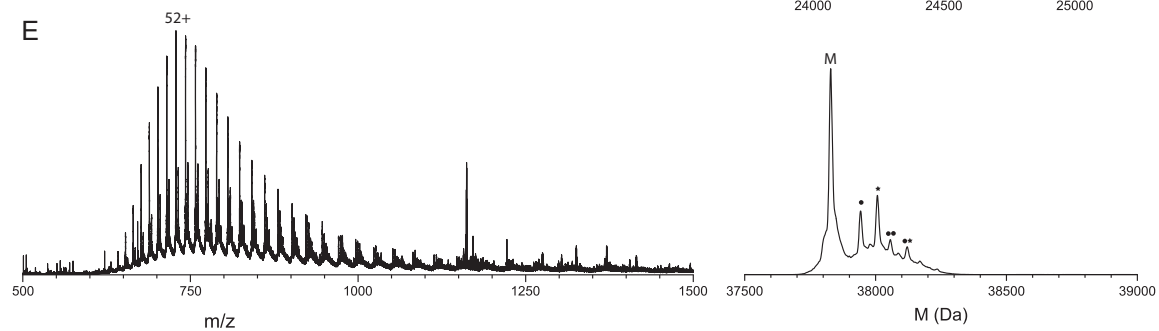

**Supplementary Figure 2, related to Figure 1. Denaturing mass spectra of N protein truncations N<sub>NTD</sub>, N<sub>CTD</sub>, N<sub>NTD-LKR</sub>, and N<sub>NTD-LKR-CTD</sub>. A.** DLS polydispersity table for N constructs. Higher values indicate broader size distributions. Numbers are reported as average and standard deviation of three experiments. Deconvolution yields experimental M values of 16,881 Da, 16,078 Da, 24,155 Da, and 37,829 Da for **(B)** N<sub>NTD</sub>, **(C)** N<sub>CTD</sub>, **(D)** N<sub>NTD-LKR</sub>, and **(E)** N<sub>NTD-LKR-CTD</sub> respectively, matching theoretical values within 1 Da, based on protein sequence. Deconvoluted mass spectra (right) and adduct series corresponding to pervasive trifluoroacetic adducts (delta mass 114 Da, circle) and  $\alpha$ -N-gluconoylation (delta mass 178 Da, star). TFA adducts are introduced by the ion pairing reagent in solvent, while  $\alpha$ -N-gluconoylation is a common modification occurring on His-tagged proteins. Native spray of NTD (not pictured) yielded no peaks with delta mass 114 Da, but retained a single delta mass 178 Da, confirming transient TFA adducts are an artifact of the denaturing experiment, but the  $\alpha$ -N-gluconoylation of the His-tag is covalent.

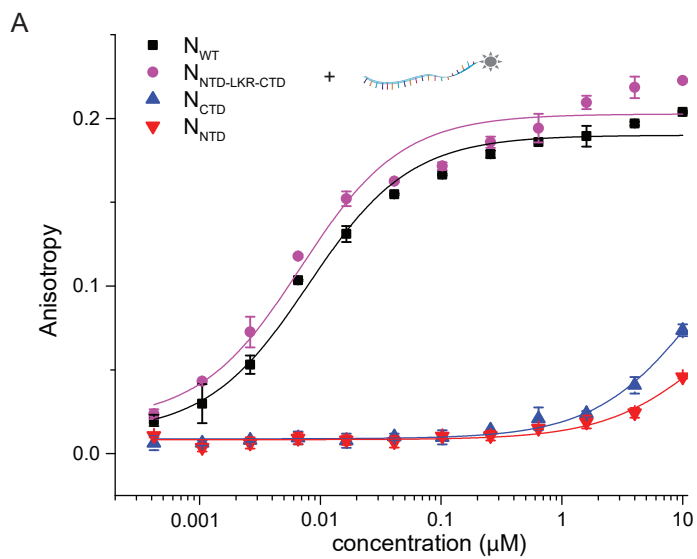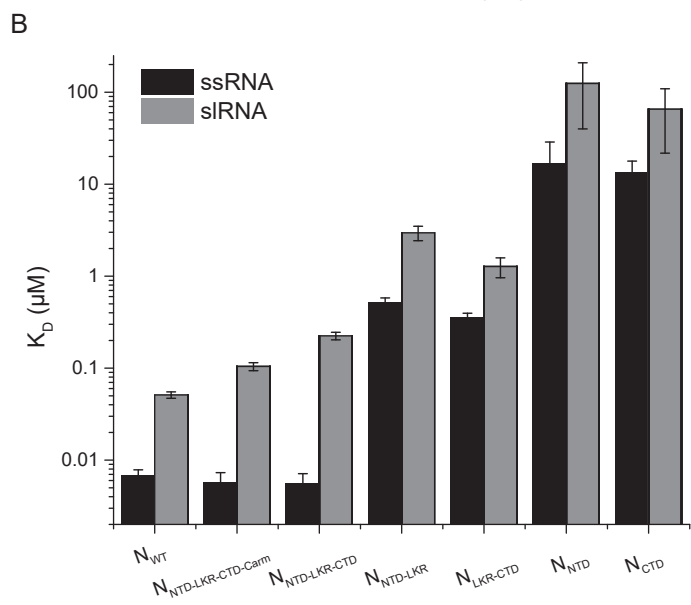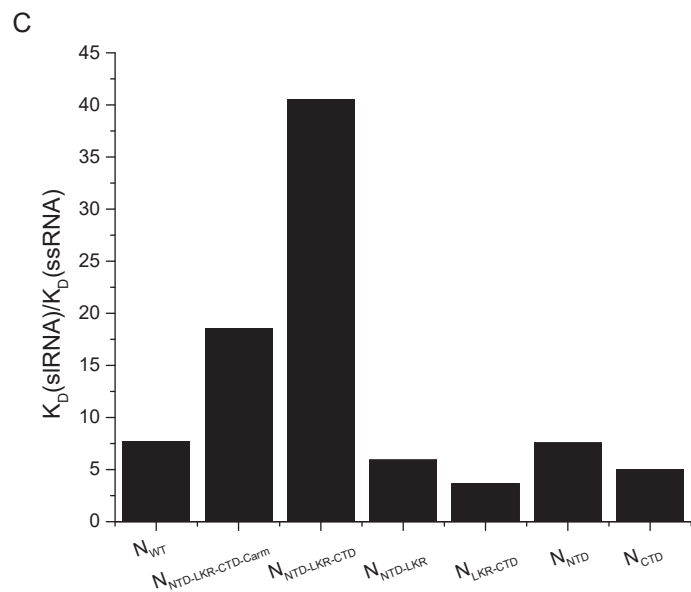

**Supplementary Figure 3, related to Figure 2. Nucleocapsid binds stem-loop RNA with reduced affinity. A.** Fluorescence anisotropy binding curves of N constructs to a 20-nt ssRNA. Anisotropy values were converted from polarization according to previous research (Kozlov et al., 2012). The fitted  $K_D$  values are  $0.007 \pm 0.001 \mu\text{M}$  ( $N_{WT}$ , black square),  $0.006 \pm 0.002 \mu\text{M}$  ( $N_{NTD-LKR-CTD}$ , magenta circle),  $14 \pm 5 \mu\text{M}$  ( $N_{CTD}$ , blue up triangle) and  $18 \pm 14 \mu\text{M}$  ( $N_{NTD}$ , red down triangle). These values are very close to those of polarization. In this system, binding monitored by anisotropy is similar to that of polarization. **B.** Fitted  $K_D$  values for N constructs binding to ssRNA (black) and siRNA (grey). **C.** Ratio of  $K_D$  of siRNA over that of ssRNA for N constructs. The reduced binding to siRNA is around 5-fold for most N constructs. The reduction is higher for those of  $N_{NTD-LKR-CTD-Carm}$  and  $N_{NTD-LKR-CTD}$ , suggesting Narm and Carm are more involved in siRNA binding.

$\beta$ 1  $\alpha$ 1  $\beta$ 2  $\beta$ 3  $\beta$ 4  $\beta$ 5  
 45 50 55 60 65 70 75 80 85 90 95 100 105 110 115  
 41 M G H G L P N N T A S W F T A L T Q H G K E D L K F P R G Q G V P I N T N S S P D D Q I G Y R R A T R R I R G G D G K M K D L S P R W Y F Y L G T

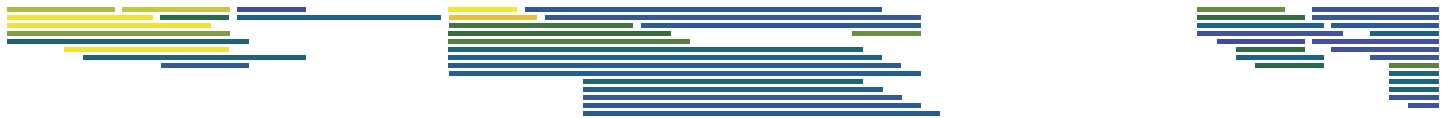

$\beta$ 6  $\beta$ 7 SR motif  
 120 125 130 135 140 145 150 155 160 165 170 175 180 185 190  
 116 G P E A G L P Y G A N K D G I I W V A T E G A L N T P K D H I G T R N P A N N A A I V L Q L P Q G T T L P K G F Y A E G D R G G S Q A S S R S S D R S

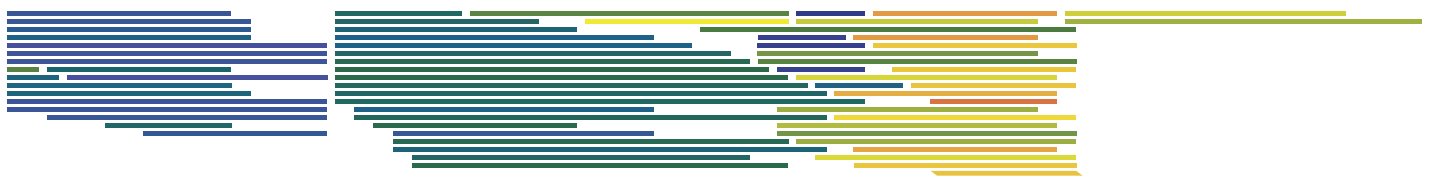

195 200 205 210 215 220 225 230 235 240 245 250 255 260  
 191 R N S S R N S T P G S S R G T D P A R M A G N G G D A A L A L L L D R L N Q L E S K M S G K G Q Q Q Q G Q T V T G S E N L Y F Q G L E H H H H H

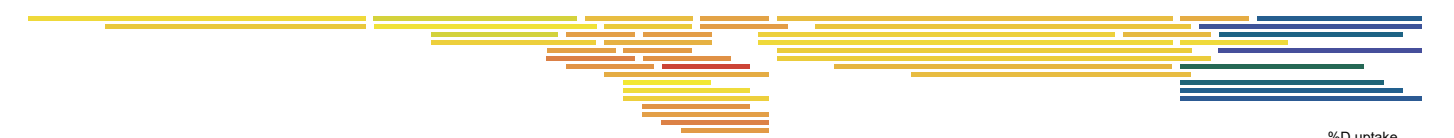

%D uptake  
 0 → 90



**Supplementary Figure 4, related to Figure 3. Sequence coverage of N<sub>NTD</sub>-LKR S176D/S188D/S206D in HDX-MS and HDX of the unbound state.** Protein coverage map of unbound state N<sub>NTD</sub>-LKR S176D/S188D/S206D HDX yielding 152 peptides with 93.3% sequence coverage. Peptide bars are colored according to their average %HDX relative to the color bar, where cooler colors depict low average %HDX and warmer colors depict high average %HDX. The secondary structure reported by PDB 6M3M is shown above the sequence. Overall, the HDX of the unbound state is largely consistent with the reported secondary structure and a well-ordered tertiary structure; regions outside of the reported structure undergo relatively rapid HDX, consistent with a lack of backbone hydrogen bonding. Interestingly, despite a lack of reported secondary structure in the region of 155-160, relatively low HDX was observed, consistent with either hydrogen bonding of secondary/tertiary structure or a hydrophobic pocket. SR-motif in LKR are boxed in red.

A

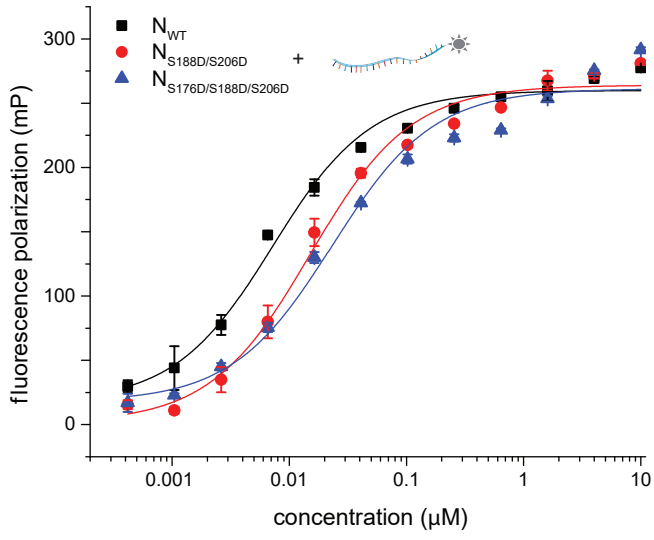

B

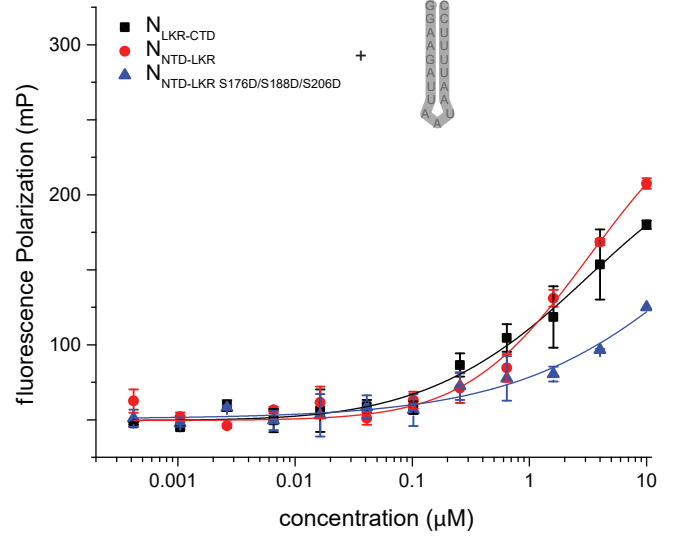

**Supplementary Figure 5, related to Figure 4. Phosphomimics of N reduce RNA binding.** **A.** Fluorescence polarization binding curves of N constructs to a 20-nt ssRNA. The fitted  $K_D$  values are  $0.007 \pm 0.001 \mu\text{M}$  for  $N_{\text{WT}}$ ,  $0.015 \pm 0.002 \mu\text{M}$  for  $N_{\text{S188D/S206D}}$ , and  $0.023 \pm 0.006 \mu\text{M}$  for  $N_{\text{S176D/S188D/S188D}}$ . **B.** Fluorescence polarization binding curves of N constructs to a 19-nt siRNA. The fitted  $K_D$  values are  $1.3 \pm 0.3 \mu\text{M}$  ( $N_{\text{LKR-CTD}}$ , black square),  $3.0 \pm 0.5 \mu\text{M}$  ( $N_{\text{NTD-LKR}}$ , red circle), and  $2.9 \pm 1.4 \mu\text{M}$  ( $N_{\text{NTD-LKR S176D/S188D/S206D}}$ , blue up triangle).
